# Supplementary material
Source: Research Square preprint supplement (doi:10.21203/rs.3.rs-9561425/v1)
Supplement: Supplementary file 2 [file 5b0a795749aefd39fb0dea68.pdf]

**Monash University Human Research Ethics Committee**
**Approval Certificate**

This is to certify that the project below was considered by the Monash University Human Research Ethics Committee. The Committee was satisfied that the proposal meets the requirements of the *National Statement on Ethical Conduct in Human Research* and has granted approval.

**Project ID:** 35445  
**Application Type:** Low Risk  
**Project Title:** Development of Empathy in General Surgeons  
**Chief Investigator:** Dr Christine Cuthbertson  
**Approval Date:** 24/10/2022  
**Expiry Date:** 24/10/2027

**Terms of approval - failure to comply with the terms below is in breach of your approval and the *Australian Code for the Responsible Conduct of Research*.**

1. The Chief Investigator is responsible for ensuring that permission letters are obtained, if relevant, before any data collection can occur at the specified organisation.
2. Approval is only valid whilst you hold a position at Monash University.
3. It is the responsibility of the Chief Investigator to ensure that all investigators are aware of the terms of approval and to ensure the project is conducted as approved by MUHREC.
4. You should notify MUHREC immediately of any serious or unexpected adverse effects on participants or unforeseen events affecting the ethical acceptability of the project.
5. The Explanatory Statement must be on Monash letterhead and the Monash University complaints clause must include your project number.
6. Amendments to approved projects including changes to personnel must not commence without written approval from MUHREC.
7. Annual Report - continued approval of this project is dependent on the submission of an Annual Report.
8. Final Report - should be provided at the conclusion of the project. MUHREC should be notified if the project is discontinued before the expected completion date.
9. Monitoring - the project may be subject to an audit or any other form of monitoring by MUHREC at any time.
10. Retention and storage of data - The Chief Investigator is responsible for the storage and retention of the original data pertaining to the project for a minimum period of five years.

Kind Regards,

Professor Nip Thomson

Chair, MUHREC

CC: Adj ClinAssProf Jenepher Martin, Professor Debra Nestel

**List of approved documents:**

| Document Type            | File Name                                             | Date       | Version |
|--------------------------|-------------------------------------------------------|------------|---------|
| Questionnaires / Surveys | Review Copy_Empathy for HP (Version 4.0)              | 21/09/2022 | 1       |
| Consent Form             | Consent - Empathy in General Surgeons - Sept 2022     | 21/09/2022 | 1       |
| Explanatory Statement    | Empathy in surgeons - explanatory statement Sept 2022 | 21/09/2022 | 1       |
| Supporting Documentation | Email text - Ethics and General Surgeons Sept 2022    | 21/09/2022 | 1       |
| Explanatory Statement    | explanatory-statement-empathy 2                       | 05/10/2022 | 2       |
| Consent Form             | consent-form-empathy - v2                             | 05/10/2022 | 2       |
